# Supplementary material for: Correlation between alveolar cleft morphology and the outcome of secondary alveolar bone grafting for unilateral cleft lip and palate
Source: Research Square preprint supplement (doi:10.21203/rs.3.rs-1514412/v1), 2022-04-08
Supplement: Supplementary file 1 [file 00b54aed55d8902f46fb7304.xlsx]

## Sheet: Sheet1
TABLE 2 Subject Information
Total cases (Alveolar clefts)				52
Age at grafts				12.31±3.08y
Sex (M:F)				39:13
Cleft type
Left:Right				26:26
UCLA:UCLP				11:41
