# Supplementary material for: Correlation between alveolar cleft morphology and the outcome of secondary alveolar bone grafting for unilateral cleft lip and palate
Source: Research Square preprint supplement (doi:10.21203/rs.3.rs-1514412/v1), 2022-04-08
Supplement: Supplementary file 2 [file 18dd309c54233d3cf6dfa3c1.xlsx]

## Sheet: Sheet1
TABLE 1 Classification of the alveolar cleft morphology in 120 patients with cleft lip and alveolous or cleft lip and palate
Type
I	40
II	4
III	16
IV	48
V	12
Total clefts	120
