# Supplementary material for: Correlation between alveolar cleft morphology and the outcome of secondary alveolar bone grafting for unilateral cleft lip and palate
Source: Research Square preprint supplement (doi:10.21203/rs.3.rs-1514412/v1), 2022-04-08
Supplement: Supplementary file 3 [file 751cec19a858dba8959c0a40.xlsx]

## Sheet: Sheet1
TABLE 4 Intergroup comparisons at different measurement levels
Measurement heights			Number of patients
			Cleft scores				Noncleft scores
			0	1	2	3	0	1	2	3
3mm			21	8	12	11	0	0	0	52
5mm			21	5	6	20	0	0	0	52
7mm			13	11	3	25	0	0	0	52
9mm			14	6	0	32	0	0	0	52
