# Supplementary material for: Correlation between alveolar cleft morphology and the outcome of secondary alveolar bone grafting for unilateral cleft lip and palate
Source: Research Square preprint supplement (doi:10.21203/rs.3.rs-1514412/v1), 2022-04-08
Supplement: Supplementary file 4 [file ab7c1693ffb37077e0217c65.xlsx]

## Sheet: Sheet2
TABLE 5 Morphology, type, side of the cleft and age,sex of patient for SABG outcomes evaluated using Spearman's/Pearson's correlation analysis
		Morphology	Morphology（subgroup)	VOLpre	Type	Side	Sex	Age
Continuous evlaution method (BFR(%))	Correlation coefficient	-0.353*	-0.505**	0.002	-0.041	0.056	0.09	-0.123
	P value	0.01	0.001	0.988	0.774	0.691	0.525	0.387
Categorical evaluation method	Correlation coefficient	-0.373**	-0.472**	0.016	0.055	0.051	0.022	-0.261
	P value	0.007	0.001	0.908	0.697	0.719	0.878	0.062
VOLpre, preoperative cleft volume; *. Correlation is significant at the 0.05 level；**. Correlation is significant at the 0.01 level
