# Supplementary material for: Correlation between alveolar cleft morphology and the outcome of secondary alveolar bone grafting for unilateral cleft lip and palate
Source: Research Square preprint supplement (doi:10.21203/rs.3.rs-1514412/v1), 2022-04-08
Supplement: Supplementary file 5 [file d6bf9c18408b57613abacfcd.xlsx]

## Sheet: Sheet1
TABLE 3 Total score of cleft and noncleft side patients
Side	Number of patients
	Failure	Poor				Moderate				Good
	0	1	2	3	4	5	6	7	8	9	10	11	12
Cleft	8	2	3	4	2	4	3	2	3	2	4	6	9
Noncleft	0	0	0	0	0	0	0	0	0	0	0	0	52
